# Supplementary material for: Seeing Gravity: Gait Adaptations to Visual and Physical Inclines – A Virtual Reality Study
Source: PubMed Central journal article supplement (PMC6992711; doi:10.3389/fnins.2019.01308), 2020-01-24

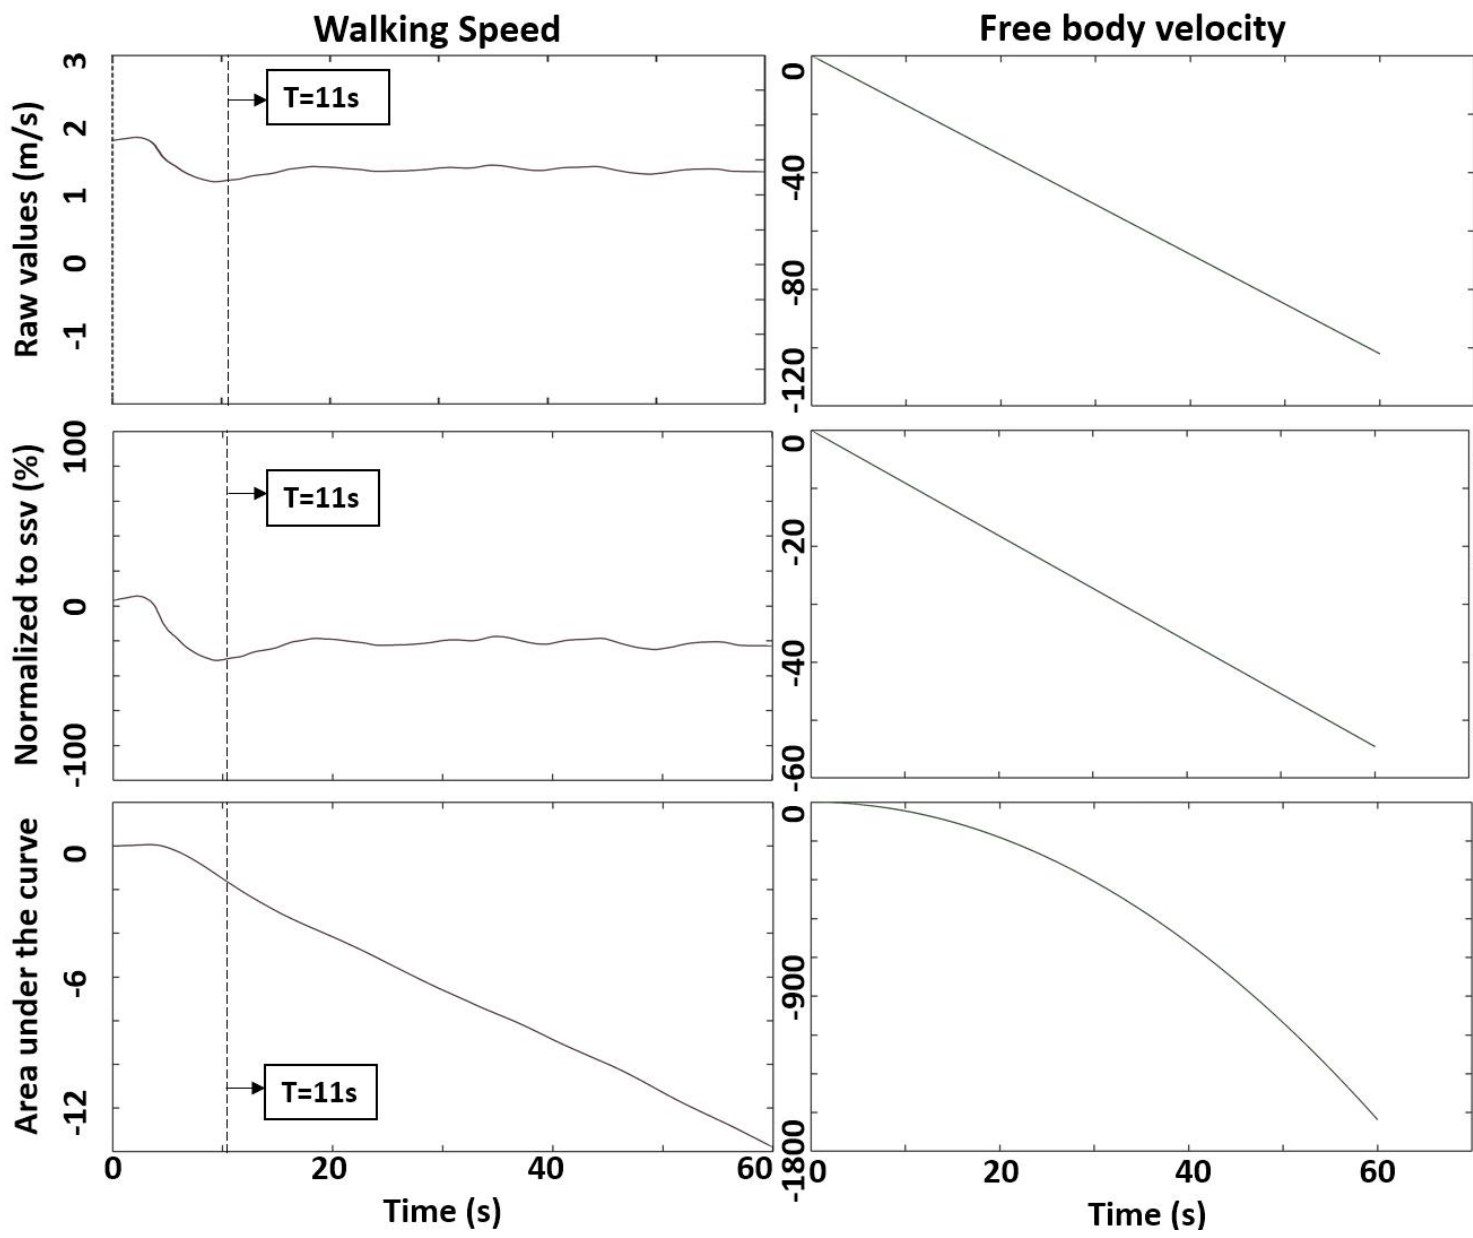

**Ratio between areas under the curve**

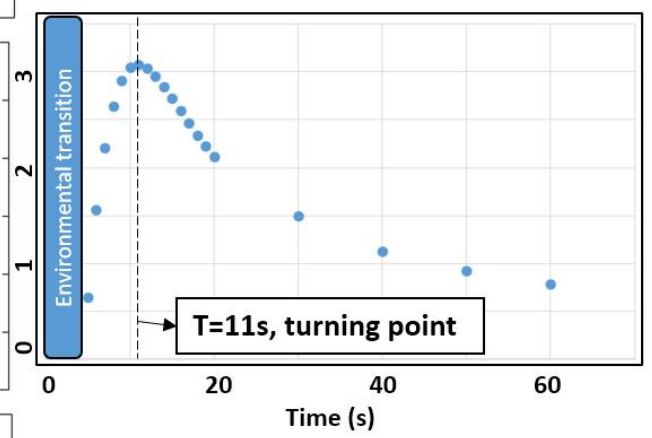

Supplement: Image_2.pdf [file Image_2.pdf]
