# Supplementary material for: Seeing Gravity: Gait Adaptations to Visual and Physical Inclines – A Virtual Reality Study
Source: PubMed Central journal article supplement (PMC6992711; doi:10.3389/fnins.2019.01308), 2020-01-24

- Cue combination  
Sensory reweighting
- Internal model of gravity
- Indirect prediction
- Locomotor modulation

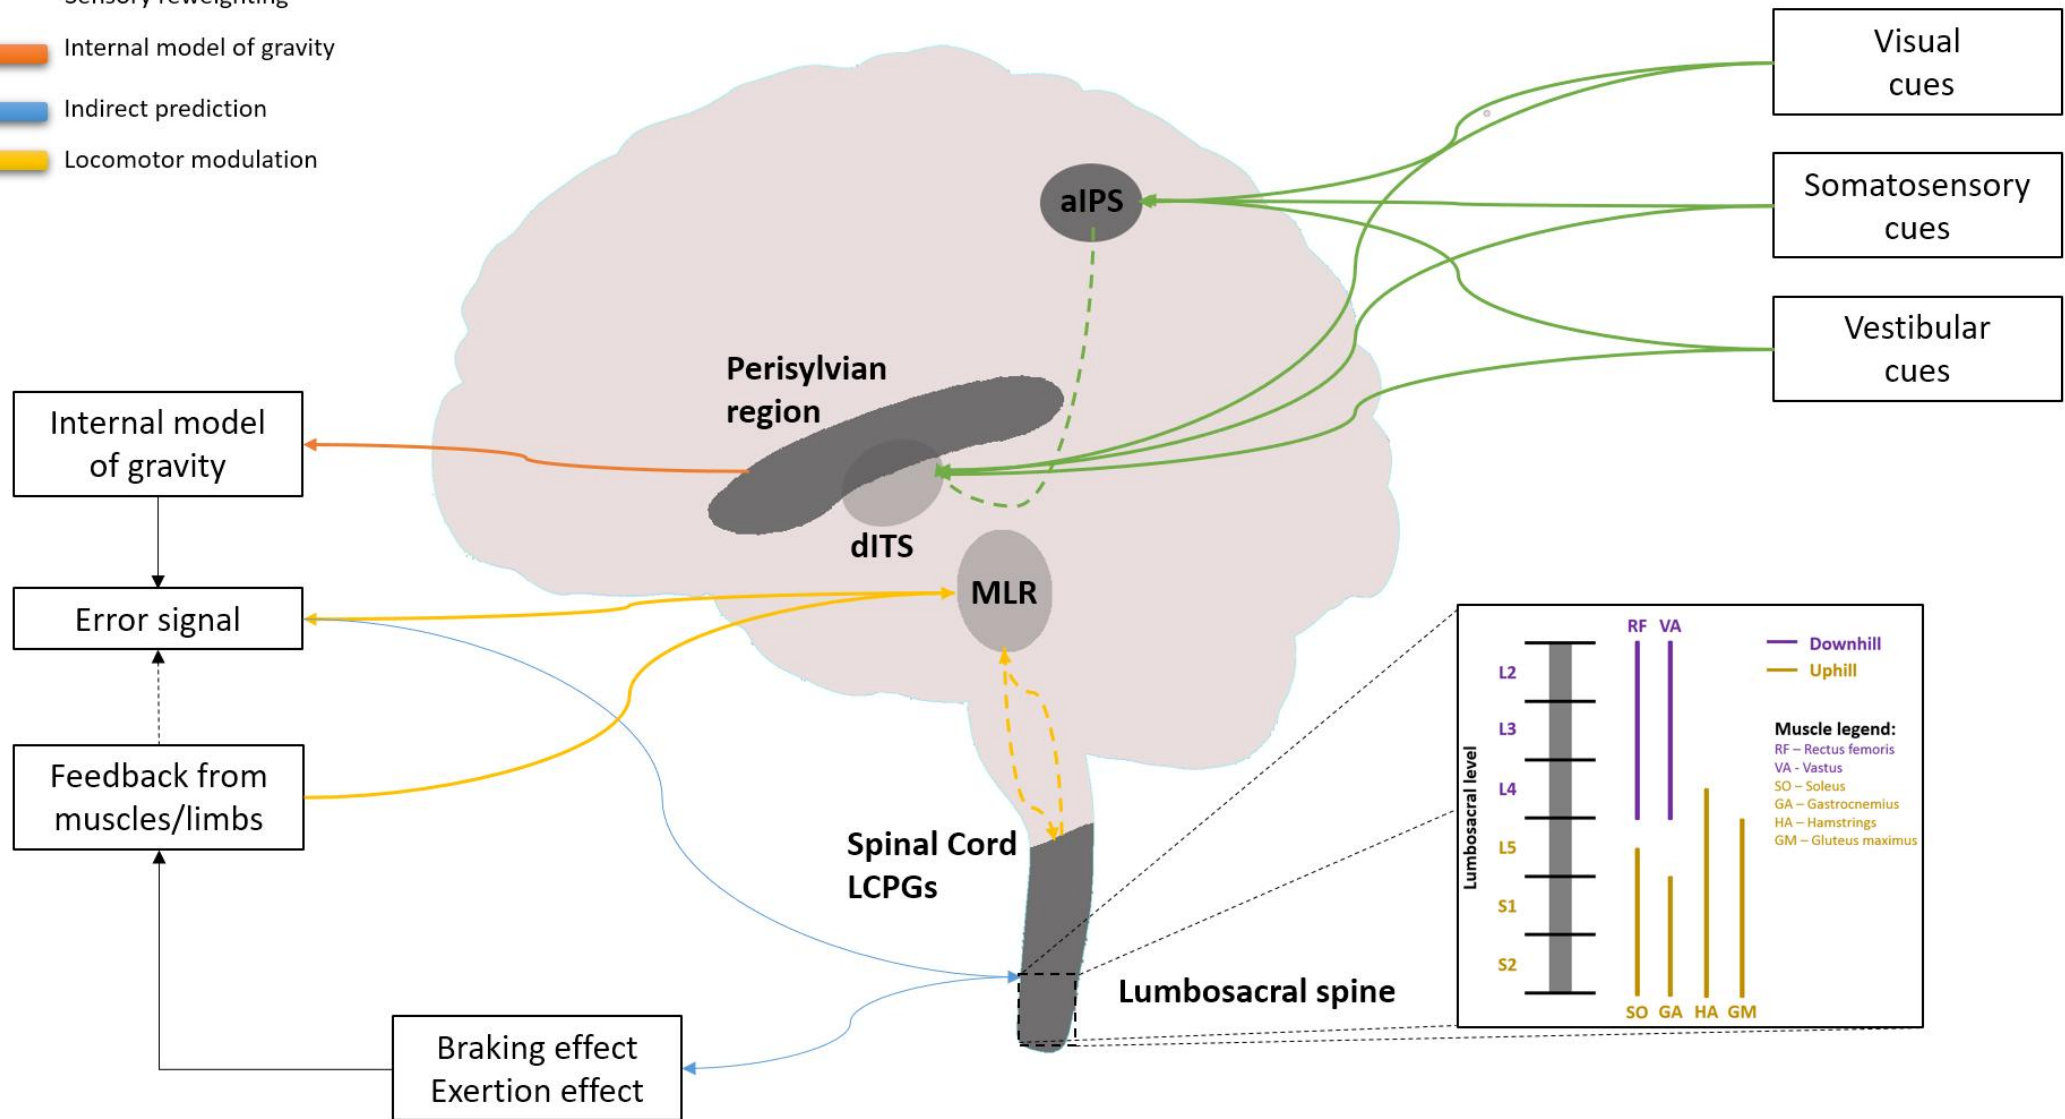

Supplement: Image_3.pdf [file Image_3.pdf]
